# Supplementary material
Source: HighWire-hosted journal article supplement (https://genome.cshlp.org/content/suppl/2004/11/09/14.10a.1938)
Supplement: Supplemental_Materials_II.pdf [file Supplemental_Materials_II.pdf]

## Supplemental Materials II- Human Multiplex

| Gene           | Acession number        | 1 <sup>st</sup> PCR Primers                                | 2 <sup>nd</sup> PCR Primers                               |
|----------------|------------------------|------------------------------------------------------------|-----------------------------------------------------------|
| <i>Ccl-5</i>   | <i>ENSG00000161570</i> | 5'-CCTGCTGCTTTGCCTACATT-3'<br>5'-TCCCAAAGTGCTGGGATTAC-3'   | 5'-GTGCCCACATCAAGGAGTAT-3'<br>5'-TCCCAAAGTGCTGGGATTAC-3'  |
| <i>Ccl-4</i>   | <i>ENSG00000129277</i> | 5'-CTCACCTCTGAGAAAACCTC-3'<br>5'-GATCAGCACAGACTTGCTTG-3'   | 5'-TACCATGAAGCTCTGCGTGA-3'<br>5'-GATCAGCACAGACTTGCTTG-3'  |
| <i>Ccl-3</i>   | <i>ENSG00000006075</i> | 5'-ACCTGCTCAGAATCATGCAG-3'<br>5'-TTCTGGACCCACTCCTCACT-3'   | 5'-CTCTCTGCAACCAGTTCTCT-3'<br>5'-TTCTGGACCCACTCCTCACT-3'  |
| <i>Gzma</i>    | <i>ENSG00000145649</i> | 5'-CTCCTCATTCAAGACCCTAC-3'<br>5'-CACATGGTTCTCTGGTTTACA-3'  | 5'-CTGCAGCTCACTGTAACCTG-3'<br>5'-CACATGGTTCTCTGGTTTACA-3' |
| <i>Gzmb</i>    | <i>ENSG00000100453</i> | 5'-CTTCTGATACGAGACGACT-3'<br>5'-CTTGTTGCTAGGTAGCCTGA-3'    | 5'-CCAGCAGTTTATCCCTGTGA-3'<br>5'-CTTGTTGCTAGGTAGCCTGA-3'  |
| <i>Pfp-1</i>   | <i>ENSG00000180644</i> | 5'-CCCTCTGTGAAAATGCCCTA-3'<br>5'-GGAGTGTGTACCACATGGAA-3'   | 5'-ACCAGCAATGTGCATGTGTC-3'<br>5'-GGAGTGTGTACCACATGGAA-3'  |
| <i>CD3-ε</i>   | <i>ENSG00000160585</i> | 5'-GGTTATTATGTCTGCTACCC-3'<br>5'-GGTCAGATGCGTCTCTGATT-3'   | 5'-TGGAGATGGATGTGATGTCG-3'<br>5'-GGTCAGATGCGTCTCTGATT-3'  |
| <i>IL2</i>     | <i>ENSG00000109471</i> | 5'-CTCACCAGGATGCTCACATT-3'<br>5'-ACAATGGTTGCTGTCTCATC-3'   | 5'-AACCTCTGGAGGAAGTGCTA-3'<br>5'-ACAATGGTTGCTGTCTCATC-3'  |
| <i>IL10R</i>   | <i>ENSG00000110324</i> | 5'-CCTAGAGATCCACAATGGCT-3'<br>5'-TGCACTCCTCTTTAGACCAC-3'   | 5'-CGGGAAGATTCAGCTACCCA-3'<br>5'-TGCACTCCTCTTTAGACCAC-3'  |
| <i>IL10</i>    | <i>ENSG00000136634</i> | 5'-TGAAGGATCAGCTGGACAAC-3'<br>5'-CACGGCCTTGCTCTTGTTT-3'    | 5'-AGCCTTGCTGAGATGATCC-3'<br>5'-CACGGCCTTGCTCTTGTTT-3'    |
| <i>Tgf-βR1</i> | <i>ENSG00000106799</i> | 5'-CCGTGAGGCAGAGATTTATC-3'<br>5'-TGCCAGTCCTAAGCTGCAA-3'    | 5'-CAATGGTACTTGACTCAGC-3'<br>5'-TGCCAGTCCTAAGCTGCAA-3'    |
| <i>Tgf-βR2</i> | <i>ENSG00000163513</i> | 5'-ACACTAGAGACAGTTTGCCA-3'<br>5'-GCTGATGCCTGTCACTTGAAA-3'  | 5'-TGGAAGATGCTGCTTCTCCA-3'<br>5'-GCTGATGCCTGTCACTTGAAA-3' |
| <i>Af-1</i>    | <i>ENSG00000159128</i> | 5'-CGACAGTAAATGGTTCACGG-3'<br>5'-GGTATCAGCGATGTCAAAGG-3'   | 5'-CACAGATCACAGCAACAGAG-3'<br>5'-GGTATCAGCGATGTCAAAGG-3'  |
| <i>TNF-α</i>   | <i>ENSG00000111956</i> | 5'-CTCTTCTCCTTCTGATCGT-3'<br>5'-CTGGGAGTAGATGAGGTACA-3'    | 5'-CTCTCTCTAATCAGCCCTCT-3'<br>5'-CTGGGAGTAGATGAGGTACA-3'  |
| <i>Lt-α</i>    | <i>ENSG00000173503</i> | 5'-ACACCACCTGAACGTCTCTT-3'<br>5'-GGAAGGCACGGTCCGTGTTT-3'   | 5'-TGTTGGCCTCACACCTTCA-3'<br>5'-GGAAGGCACGGTCCGTGTTT-3'   |
| <i>Ifn-γ</i>   | <i>ENSG00000111537</i> | 5'-CTGTTACTGCCAGGACCCAT-3'<br>5'-TGGATGCTCTGGTCATCTTT-3'   | 5'-GGTCATTAGATGTAGCGGA-3'<br>5'-TGGATGCTCTGGTCATCTTT-3'   |
| <i>Tgf-β</i>   | <i>ENSG00000105329</i> | 5'-GACAAGTTCAAGCAGAGTACA-3'<br>5'-CACAACCTCCGGTGACATCAA-3' | 5'-ACACATCAGAGCTCCGAGAA-3'<br>5'-CACAACCTCCGGTGACATCAA-3' |
| <i>Tnfsf-6</i> | <i>ENSG00000117560</i> | 5'-ACACATCAGAGCTCCGAGAA-3'<br>5'-GGCAGGTTGTTGCAAGATTG-3'   | 5'-CAGCTCTTCCACCTACAGAA-3'<br>5'-GGCAGGTTGTTGCAAGATTG-3'  |
| <i>CCR7</i>    | <i>ENSG00000126353</i> | 5'-CCTTCCTGTGTGGTTTACC-3'<br>5'-CATGGTCTTGAGCCTCTTGA-3'    | 5'-TGGTGGCTCTCCTTGTCATT-3'<br>5'-CATGGTCTTGAGCCTCTTGA-3'  |

**Table Supplemental Materials.** Specific primers used for the first and second PCR. Primers on the top: 5' primers; Primers on the bottom: 3' primers. Reverse transcription reactions were carried out using the 3' primer indicated for each individual gene. Accession numbers correspond to gene sequences obtained at the Ensembl Project Homepage (<http://www.ensembl.org>).
